# Supplementary material for: Novel and effective strategy of dual bis(trifluoromethylsulfonyl)imide imidazolium ionic liquid immobilized on periodic mesoporous organosilica for greener cycloaddition of carbon dioxide to epoxides
Source: Royal Society of Chemistry journal article supplement (doi:10.1039/c8nj05273e), 2019-01-01
Supplement: c8nj05273e1.pdf [file c8nj05273e1.pdf]

## Supporting Information

Novel and effective strategy of dual bis(trifluoromethylsulfonyl)imide  
imidazolium ionic liquid immobilized on periodic mesoporous  
organosilica-mediated greener cycloaddition of carbon dioxide to epoxides

Jin Tan<sup>a</sup>, Dong Fang,<sup>b</sup> Yang Liu<sup>a</sup> and Yu Lin Hu<sup>\*a</sup>

<sup>a</sup> *College of Materials and Chemical Engineering, Key laboratory of inorganic nonmetallic crystalline and  
energy conversion materials, China Three Gorges University, Yichang 443002, P. R. China*

<sup>b</sup> *College of Chemistry and Environmental Engineering, Yancheng Teachers University, Yancheng 224002,  
P. R. China*

\*Correspondence to: E-mail: huyulin1982@163.com

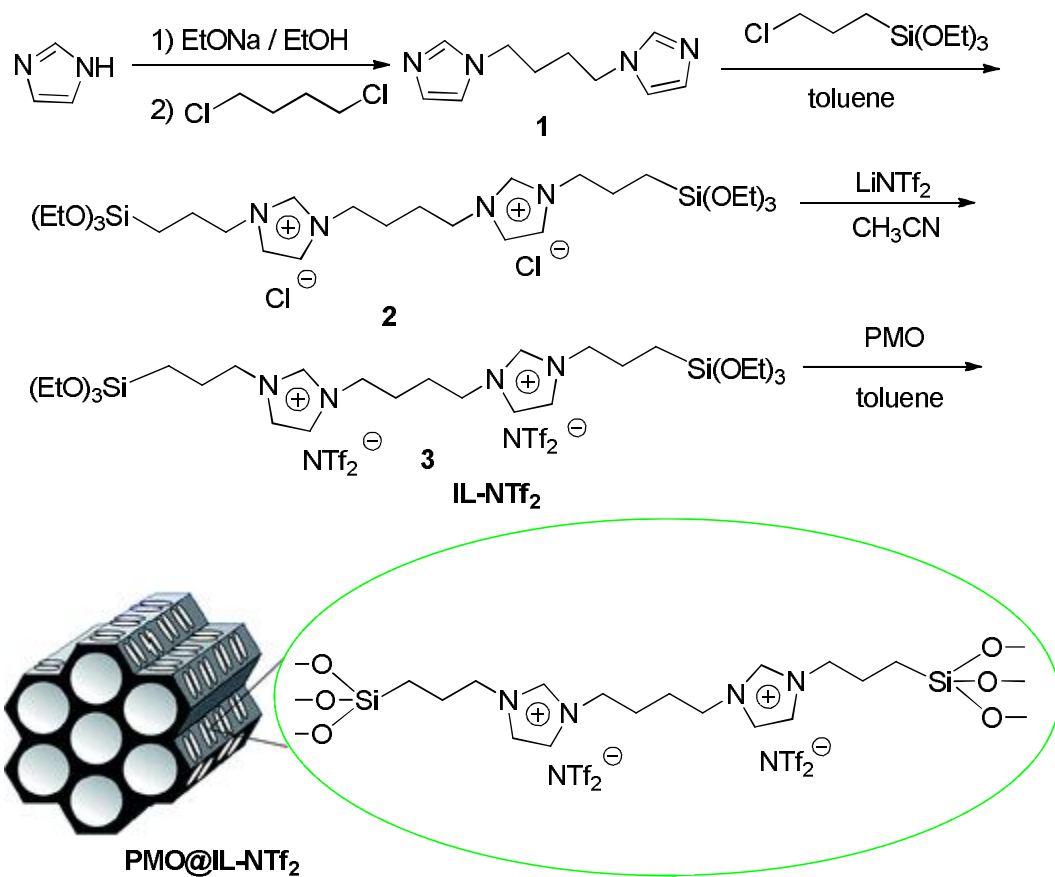

Scheme S1 Preparation of PMO@IL-NTf<sub>2</sub>.

**Table S1** EDX elemental composition of PMO and PMO@IL-NTf<sub>2</sub>

| Sample                        | Si (wt.%) | C (wt.%) | O (wt.%) | F (wt.%) |
|-------------------------------|-----------|----------|----------|----------|
| PMO                           | 51.32     | 1.79     | 47.29    | -        |
| PMO@IL-NTf <sub>2</sub> (0.5) | 46.42     | 6.31     | 42.75    | 0.16     |
| PMO@IL-NTf <sub>2</sub> (1.0) | 39.27     | 13.71    | 36.09    | 2.51     |
| PMO@IL-NTf <sub>2</sub> (1.5) | 28.34     | 17.95    | 31.27    | 4.38     |

**Table S2** BET surface area and pore volume of the samples

| Sample                        | S <sub>BET</sub> (m <sup>2</sup> /g) | V (cm <sup>3</sup> /g) | D (nm) |
|-------------------------------|--------------------------------------|------------------------|--------|
| PMO                           | 539.26                               | 0.82                   | 5.80   |
| PMO@IL-NTf <sub>2</sub> (1.0) | 316.14                               | 0.51                   | 5.57   |

**Table S3** Elemental analysis of the fresh and reused PMO@IL-NTf<sub>2</sub>(1.0)

| Catalyst               | C (wt.%) | Si (wt.%) | F (wt.%) |
|------------------------|----------|-----------|----------|
| Fresh catalyst         | 14.65    | 41.32     | 2.54     |
| Second reused catalyst | 14.58    | 41.22     | 2.49     |
| Fourth reused catalyst | 14.52    | 41.17     | 2.43     |
| Sixth reused catalyst  | 14.41    | 41.09     | 2.36     |

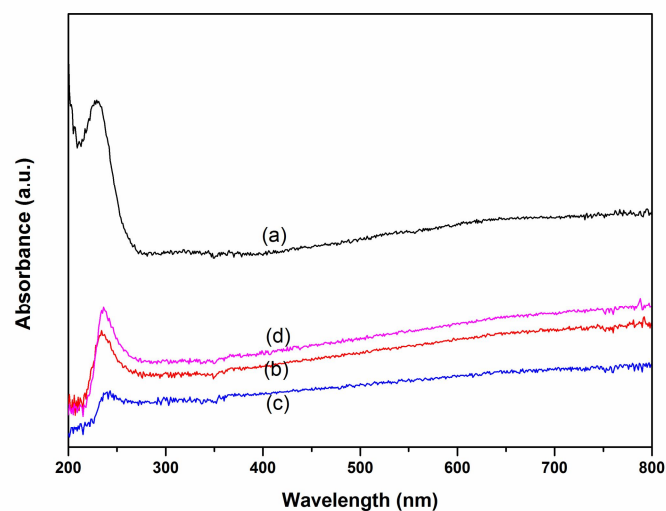

**Fig. S1** UV-Vis spectras of PMO (a), PMO@IL-NTf<sub>2</sub>(0.5) (b), PMO@IL-NTf<sub>2</sub>(1.0) (c), and PMO@IL-NTf<sub>2</sub>(1.5) (d).

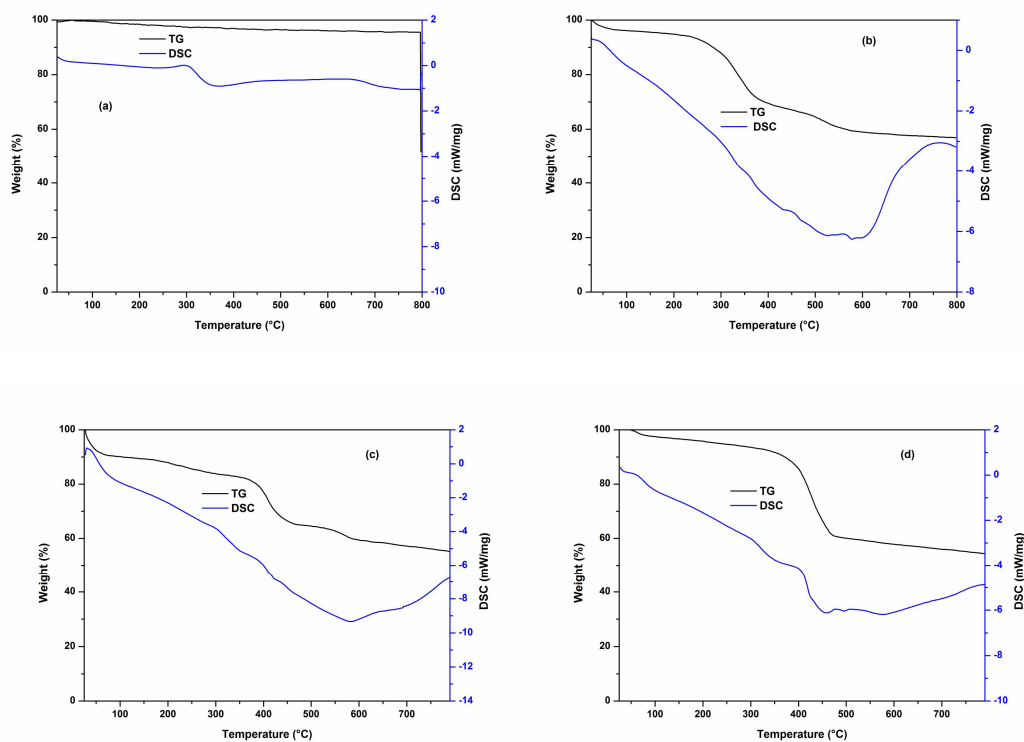

**Fig. S2** TG/DSC curves of PMO (a), PMO@IL-NTf<sub>2</sub>(0.5) (b), PMO@IL-NTf<sub>2</sub>(1.0) (c), and PMO@IL-NTf<sub>2</sub>(1.5) (d).

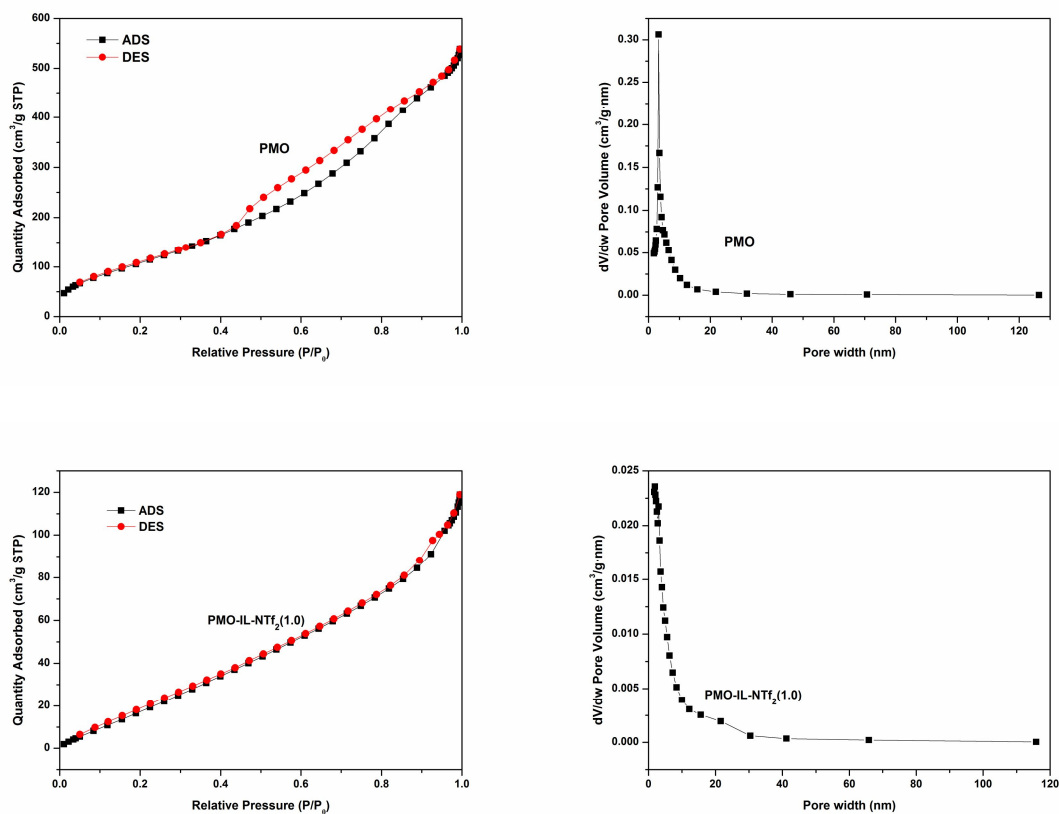

**Fig. S3** N<sub>2</sub> adsorption-desorption isotherms and pore size distribution of PMO and PMO@IL-NTf<sub>2</sub>(1.0).

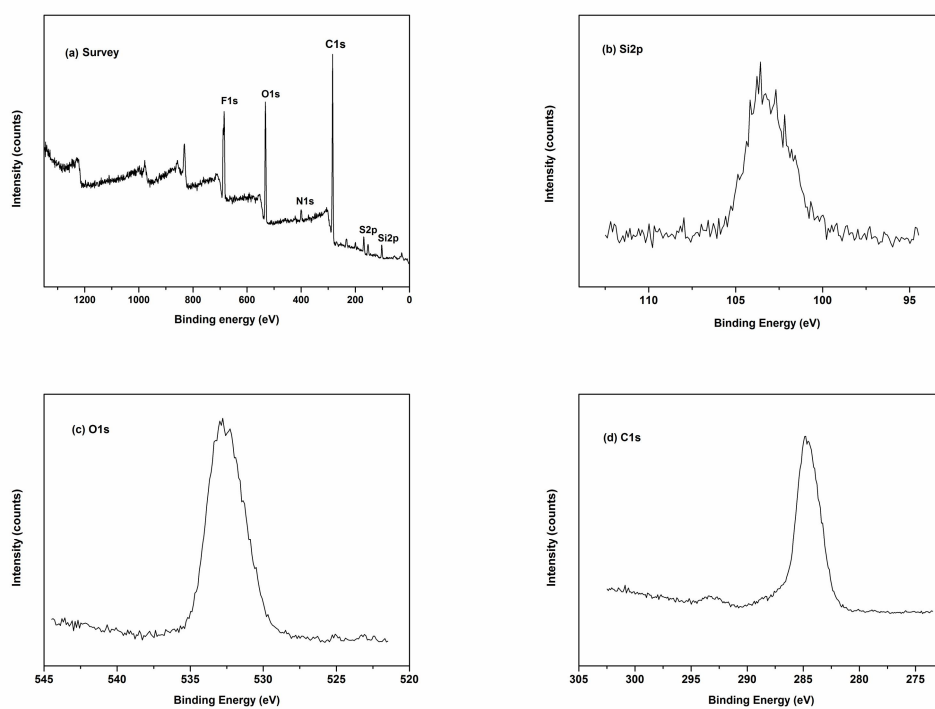

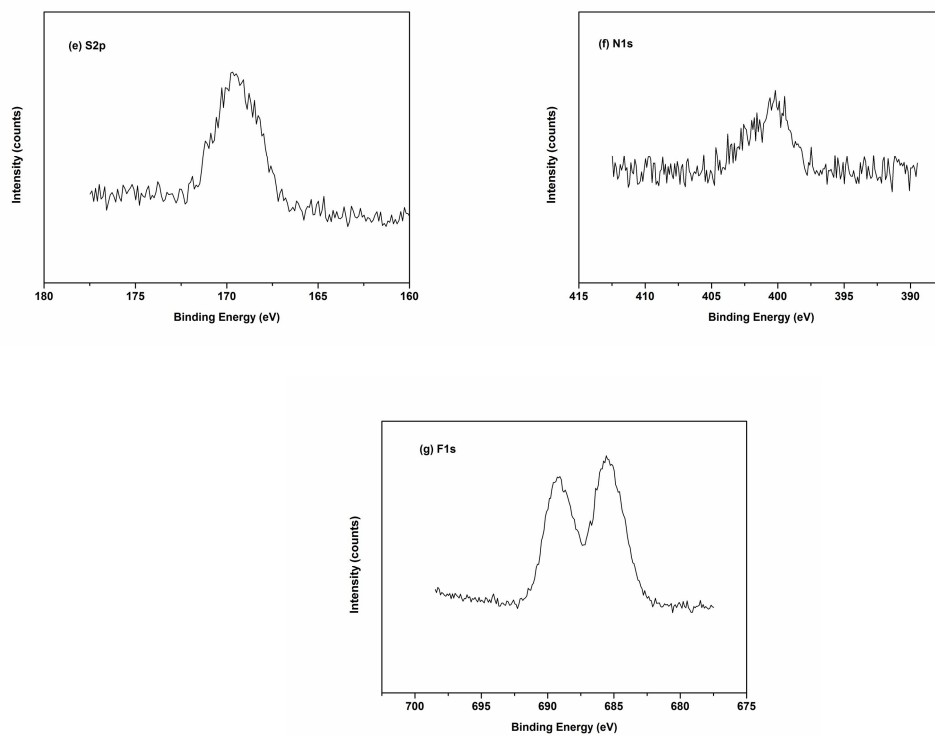

**Fig. S4** XPS spectra of PMO@IL-NTf<sub>2</sub>(1.0) (a) survey of the catalyst, (b) Si2p, (c) O1s, (d) C1s, (e) S2p, (f) N1s, (g) F1s.

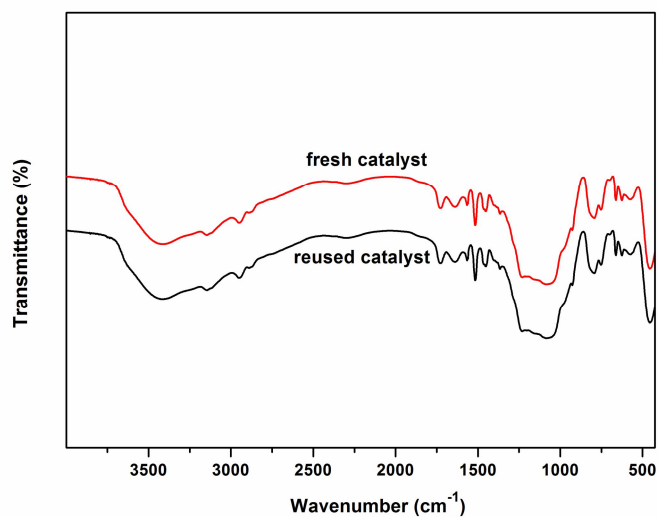

**Fig. S5** FT-IR spectra of the fresh and reused PMO@IL-NTf<sub>2</sub>(1.0).

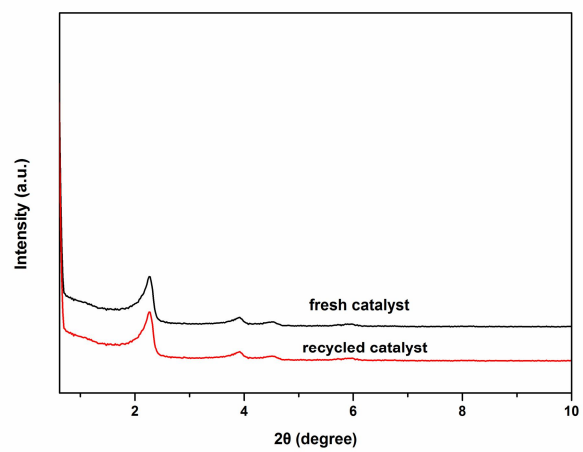

**Fig. S6.** PXRD patterns of PMO@IL-NTf<sub>2</sub>(1.0) before and after reaction.
